# Supplementary material
Source: Research Square preprint supplement (doi:10.21203/rs.3.rs-9656938/v1)
Supplement: Supplementary file 1 [file 468c7e13e96a29157663a4df.docx]

**APPENDIX 1: IBADAN HPV STUDY QUESTIONNAIRE**

**SECTION A: SOCIO-DEMOGRAPHIC INFORMATION**

**Local Government Area: ……………………………………….**

**City: ………………………………………………………………………………………..**

**Area …………………………………………………………………………………………**

**Type 1.** ☐**Urban 2.**☐ **Rural 3.**☐ **Semi Urban**

1. Age: __________
2. Sex: 1. ☐ Male 2. ☐ Female
3. Marital Status: 1.☐ Married 2.☐ Single 3. ☐ Divorced 4.☐ Widowed
4. Education Level: 1.☐ None 2.☐ Primary 3.☐ Secondary 4.☐ Tertiary
5. Location: ______________________
6. Religion: 1.☐ Christian 2.☐ Muslim 3.☐ Traditional 4.☐ Other: _______
7. Occupation: ______________________
8. Do you have a female child within the age of 8-14 1.☐ Yes 2.☐ No
9. What is your relationship to the female child?

1.☐ Father 2.☐ Mother 3.☐Male Guardian 4.☐ Female Guardian

1. Please indicate details of the ages of your daughter(s) within age of 8-14 years?

| S/N | Age |
| --- | --- |
| i |  |
| ii |  |
| iii |  |
| iv |  |

**SECTION B: KNOWLEDGE OF MOTHERS OF ADOLESCENT GIRLS ABOUT HUMAN PAPLLOMA VIRUS**

11.Have you heard of the human papillomavirus (HPV)? 1.[ ] Yes 2.[ ] No 3.[ ] Not sure

12. In your own words, what is HPV? _____________________________________________________________________

13. Which of the following are ways HPV can be transmitted? (Check all that apply)
1. [ ] Vaginal sex 2. [ ] Anal sex 3. [ ] Oral sex 4. [ ] Casual skin-to-skin contact 4. [ ] Mother-to-infant at birth 5.[ ] Sharing unsterile objects 6. [ ] Any other, please state __________________

14.What is the symptom of Human Papillomavirus ____________________________________

15. Can someone be infected with HPV without showing symptoms? 1.[ ] Yes 2.[ ] No 3.[ ] Not sure

16. Who among the following can be infected with HPV? (Check all that apply)
 1. [ ] Only women 2.[ ] Both men and women 3.[ ] Adolescents 4. [ ] Only young people 5. [ ] Anyone who is sexually active 6. [ ] Only older people

17. Which of the following do you know as the consequences of HPV infection (check all that apply) 1. [ ] Penile cancer 2.[ ] Cervical cancer 3.[ ] Oropharyngeal cancer 4.[ ] Anal cancer 5. [ ] others…………..

18. Can HPV infection be prevented? 1.[ ] Yes 2.[ ] No

19. If yes, what are the ways to prevent HPV infection? (check all that apply)

1.[ ] Vaccination 2.[ ] Abstinence 3.[ ] Fidelity to partner 4.[ ] Protection 5.[ ] Avoiding sex with risky sexual partners 6.[ ] Avoiding extra-vaginal sex

**SECTION C: DETERMINANTS OF PARENTAL KNOWLEDGE ABOUT HPV INFECTION**

20. Where have you heard about HPV infection? (Check all that apply)

1.[ ] Healthcare provider 2.[ ] TV/Radio 3.[ ] Newspaper 4.[ ] Internet

5.[ ] Social media 6.[ ] Community program 7.[ ] Friends 8.[ ] Relatives

**SECTION D: PERCEPTION OF RISK OF HPV INFECTION TO DAUGHTERS**

21. My daughter is at risk of getting HPV. 1. [ ] Agree 2.[ ] Undecided 3.[ ] Disagree

22. How serious do you think HPV infection would be for your daughter?
 1. [ ] Serious 2.[ ] Undecided 3.[ ] Not serious

**SECTION E: BARRIERS TO PREVENTIVE ACTIONS AGAINST HPV INFECTION**

| **S/N** | **Statement** | **Disagree** | **Agree** |
| --- | --- | --- | --- |
| 23 | Talking to my daughter about sexual health will encourage early sexual activity |  |  |
| 24 | My cultural beliefs discourage discussing sexual health topics. |  |  |

**SECTION F: PREVENTIVE PRACTICES ADOPTED FOR DAUGHTERS**

25. In a general discussion with your daughter, which one of the following is included in the discussion (check all that apply)

1.[ ] Abstinence 2.[ ] practice safe sex 3.[ ] Personal hygiene 4.[ ] Avoiding risky behaviors 5.[ ] None of the above

1. Which of the following will you prefer your daughter to practice (check all that apply) [ ] use of condom 1.[ ] No sexual debut 2.[ ] Avoiding multiple partners 3.[ ] Not sure
2. Describe any steps you have taken to protect your daughter from HPV infection

……………………………………………………………………………………………………….

**SECTION G: KNOWLEDGE OF MOTHERS OF ADOLESCENT GIRLS ABOUT CERVICAL CANCER**

1. Have you ever heard of cervical cancer? 1. ☐ Yes 2. ☐ No
2. How do you know someone has cervical cancer?…………………………………………..
3. What do you know to be the cause of cervical cancer?
   1.☐ Infection 2.☐ Disease passed down from mother to daughter

3.☐ Other Causes (Please specify)…………………………………

31. Which of the following do you know that can make your daughter more likely than others to have cervical cancer? Tick all that apply

1.☐ Having sex with random partner (Casual sex) 2.☐ Having sex with multiple partners

3.☐ Having sex without condoms 4.☐ Commencing sexual activity at very early age 5.☐ I don’t know 5.☐ Other (please specify): ___________

1. Can cervical cancer be prevented 1.☐ Yes 2.☐ No

33. Have you ever heard of any methods used to prevent cervical cancer? 1.☐ Yes 2.☐ No

34. If yes, which one of the following can be applied to prevent cervical cancer in daughters aged 8-14? 1.☐ HPV vaccination 2.☐ Sex Education 3.☐ I don’t know 4.☐ Others Specify………...

35. Which of the following cervical cancer prevention methods have you heard? *(You may select more than one)* 1.☐ Human Papillomavirus (HPV) vaccination 2.☐ Pap smear screening 3.☐ Self-sampling HPV test 4.☐ Visual Inspection with Acetic Acid (VIA)
5.☐ Sexual Fidelity 6.☐ Delayed sexual debut 7.☐ Safer Sexual Practices 8.☐ HPV DNA test 7.☐ Co-testing (Pap smear + HPV test) 8.☐ Others (please specify): ____

1. Which of the cervical cancer prevention practices have you provided for your daughter

1.☐ Health Education 2.☐ HPV Vaccine 3.☐ Others Specify…………………………..

**SECTION H: PERCEPTION OF MOTHERS OF ADOLESCENT GIRLS ABOUT RISK OF CERVICAL CANCER**

**Cervical cancer Risk Perception**

For the youngest daughter under your care aged 8-14, kindly answer the following questions. Please indicate your level of agreement with the following statements using this scale: 1 = Disagree 2 = Agree.

| **S/N** | **Question** | **Disagree** | **Agree** |
| --- | --- | --- | --- |
|  | **Perceived Susceptibility** |  |  |
| **37** | I consider my daughter at risk of developing cervical cancer. |  |  |
| **38** | It is considered that girls in my household could be affected by cervical cancer. |  |  |
| **39** | I consider that girls in my community could develop cervical cancer. |  |  |
|  | **Perceived Severity** |  |  |
| **40** | Cervical cancer is a serious health problem |  |  |
| **41** | The consequences of cervical cancer would be severe for my daughter |  |  |
| **42** | The consequences of cervical cancer would be severe for my family |  |  |
| **43** | Cervical cancer negatively affects a person’s quality of life. |  |  |
|  | **Perceived Benefits of cervical cancer prevention** |  |  |
| **44** | Taking preventive actions such as HPV vaccination reduces the possibility of developing cervical cancer. |  |  |
| **45** | Early detection of cervical cancer improves the outcome of cervical cancer |  |  |
| **46** | Taking preventive actions improves the outcome of cervical cancer |  |  |

**Perceived Barriers to uptake of cervical cancer prevention**

| **S/N** | **Question** | **Disagree** | **Agree** |
| --- | --- | --- | --- |
| **47** | I am concerned about the side effects of the HPV vaccine. |  |  |
| **48** | For me getting access to cervical cancer prevention services is difficult. |  |  |
| **49** | For me access to cervical cancer prevention services is expensive |  |  |
| **50** | For me the nearest vaccination center is too far from my home |  |  |

**SECTION I: KNOWLEDGE OF MOTHERS OF ADOLESCENT GIRLS ABOUT HUMAN PAPLLOMA VIRUS VACCINE**

51. Have you heard of HPV vaccines before? 1.☐ Yes 2.☐ No

52. Where did you hear about the vaccine? (Select all that apply)
1. ☐ Health workers 2. ☐ Media 3. ☐ School 4. ☐ Family/Friends 5. ☐ Religious leader 6. ☐ Others: ____________

53. What is the HPV vaccine used for? 1.☐ To prevent cervical cancer 2. ☐ To cure HPV infection 3. ☐ To treat infertility 4. ☐ Don’t know

54. What are the benefits of receiving the HPV vaccine? (Select all that apply)

1. ☐ Prevents cervical cancer 2. ☐ Prevents genital warts 3. ☐ Improves fertility 4. ☐ Don’t know

55. What are the possible side effects of HPV vaccine? (Select all that apply)

1.☐ Pain or swelling at injection site 2. ☐ Fever 3. ☐ Fainting or dizziness 4. ☐ Infertility 5. ☐ Don’t know

56. How many doses of the HPV vaccine are needed for full protection in adolescents?

1. ☐ One dose 2. ☐ Two doses 3. ☐ Three doses 4. ☐ Don’t know

57. What age group is the HPV vaccine generally recommended for?

1. ☐ Under 9 years 2. ☐ 9–14 years 3. ☐ 15–20 years 4. ☐ I don’t know

58. What is the minimum recommended age for HPV vaccination?

1. ☐ 0–5 years 2. ☐ 9–14 years 3. ☐ 18 years and above 4. ☐ Don’t know

59. What is the maximum recommended age for HPV vaccination?

1. ☐ 14 years 2. ☐ 26 years 3. ☐ 49 years 4. ☐ Don’t know

60. Where can HPV vaccines be obtained in your community? (Be specific — mention names of facilities)

61. How is the HPV vaccine provided in your area?

1. ☐ Free of charge 2. ☐ Paid (out-of-pocket) 3. ☐ Don’t know

62. For how long can the HPV vaccine effect last? _________________

**SECTION J: MOTHERS DEMAND AND WILLINGNESS FOR HPV VACCINE**

63. Have any of your daughter(s) received the HPV vaccine? 1.☐ Yes 2. ☐ No

64. If YES, how many doses has she received?

1. ☐ One dose 2. ☐ Two doses 3. ☐ Don’t know

1. If yes, please indicate the age at which each of them got vaccinated (Interviewer ask about each daughter within ages 8-14 years and fill the rows below for each daughter

| S/N | Age | Age at Vaccination  with HPV Vaccine | Record  (Available/Seen | Where Vaccination took Place  (School/Clinic/hospital/  primary health centre |
| --- | --- | --- | --- | --- |
| I |  |  |  |  |
| Ii |  |  |  |  |
| Iii |  |  |  |  |
| Iv |  |  |  |  |

1. Did any of them experience any side effects after vaccination? 1.☐ No 2. ☐ Yes (specify)__
2. If yes, which side effect __________________________________________________
3. If your child has not yet received the HPV vaccination, what are the reasons? (Tick all that apply) 1. ☐ I am not aware of the vaccine 2. ☐ It is too expensive 3. ☐ I don’t know where to get it 4. ☐ I believe my daughter is not at risk and therefore does not need the vaccine 5. ☐ I am concerned about side effects 6. ☐ My culture does not support vaccination 7. ☐ My religion does not support vaccination 8. ☐ Other (please specify): ___________

69. Have you seen or heard of any other parents in your community vaccinating their daughters? 1. ☐ Yes 2. ☐ No

70. If your child has not received vaccination, are you willing to vaccinate your child?

1.☐ Yes 2. ☐ No

**SECTION K: FACTORS INFLUENCING CERVICAL CANCER PREVENTION PRACTICES**

**Health System and Accessibility**

| **S/N** | **Question** | **Disagree** | **Agree** |
| --- | --- | --- | --- |
| **71** | Health care workers at the nearby HPV vaccination facilities are friendly |  |  |
| **72** | There are long waiting times at health centers which discourage me from seeking HPV vaccination for my daughter |  |  |
| **73** | Clinic opening hours are convenient for me to go with my daughter for screening or HPV vaccination |  |  |
| **74** | Transportation difficulties make it hard for my daughter to go for HPV vaccination |  |  |
| **75** | I trust the health system to provide safe and effective cervical cancer prevention services |  |  |

**Decision Making Factors**

| **S/N** | **Questions** | **Disagree** | **Agree** |
| --- | --- | --- | --- |
| **76** | If I wanted to get HPV vaccine for my daughter, I could do so without asking anyone’s permission. |  |  |
| **77** | My partner must approve before I schedule HPV vaccination for my daughter. |  |  |
| **78** | I rely on health-care providers’ advice more than my own judgment when deciding about HPV vaccination for my daughter. |  |  |

**SECTION L: FACTORS INFLUENCING VACCINE ACCEPTANCE**

**I. Contextual Influences (Cultural and Community Context)**

Please indicate your response to the following as follows: Agree (A) Disagree (D),

| **S/N** | **Statements** | **Disagree** | **Agree** |
| --- | --- | --- | --- |
| 79 | My community elders do not support HPV vaccination |  |  |
| 80 | My religion do not support HPV vaccination |  |  |
| 81 | Vaccinating daughters will encourage early and frequent sexual activities |  |  |
| 82 | I will not vaccinate my child because other people in my community will not vaccinate their daughters |  |  |
| 83 | I prefer traditional medicine practices in my culture over vaccination |  |  |
| 84 | The opinion of my friends are an important consideration in my decision to vaccine my daughter |  |  |
| 85 | The opinion of my family are an important consideration in my decision to vaccine my daughter |  |  |
| 86 | If someone I trust is against HPV vaccines, it affects my decision |  |  |
| 87 | I prefer to wait and see how other children react before vaccinating mine. |  |  |
| 88 | I have refused or avoided HPV vaccine because of something I heard about it. |  |  |
| 89 | My vaccination decisions depends on outcome of my discussion with my spouse |  |  |

**Trust In Health Authority And Government**

| S/N | Statements | **Disagree** | **Agree** |
| --- | --- | --- | --- |
| 90 | HPV vaccines are part of a foreign agenda to reduce our population |  |  |
| 91 | HPV vaccine is a part of government agenda to reduce fertility |  |  |
| 92 | I trust health workers to give me the right information about HPV vaccines. |  |  |
| 93 | My negative past experiences with the healthcare system reduce my willingness to vaccinate my child |  |  |

**Confidence, Complacency, Risk-Benefit**

Instructions: please indicate your level of agreement using this scale: Agree and Disagree

| **S/N** | **Statements** | **Disagree** | **Agree** |
| --- | --- | --- | --- |
| 94 | I am worried about the side effects of HPV vaccine. |  |  |
| 95 | I believe my child is healthy and does not need HPV vaccines. |  |  |
| 96 | I am afraid that HPV vaccine may weaken my child’s immune system. |  |  |
| 97 | I believe I know enough to make a good decision about HPV vaccines. |  |  |
| 98 | I do not have the certainty that the HPV vaccine can prevent the condition it is meant to prevent |  |  |

**III. Vaccine and Vaccination-specific Issues***Instructions: please indicate your level of agreement using this scale: Agree and Disagree*

| **S/N** | **Statement** | **Disagree** | **Agree** |
| --- | --- | --- | --- |
| 99 | I am confident that HPV vaccines are effective in preventing HPV infections |  |  |
| 100 | My previous experiences with vaccinations is the reason for my current decision on vaccination. |  |  |
| 101 | I am concerned about the number of vaccines given to children are too much |  |  |
| 102 | I find the HPV vaccination schedule too difficult to follow. |  |  |
| 103 | I am more comfortable when HPV vaccines are given by a known health worker. |  |  |

**Cost / Calculation**

104. I can afford to pay for the HPV vaccine if it is not free 1. ☐ Yes 2. ☐ No

105. I would be more willing to vaccinate my daughter if it is free 1. ☐ Yes 2. ☐ No

**SECTION M: MOTHERS VACCINE CONFIDENCE**

| **Statement** | **Disagree** | **Agree** |
| --- | --- | --- |
| 106. I would recommend HPV vaccines to family or friends. | ☐ | ☐ |
| 107. I will allow my daughter to receive HPV vaccines if recommended by doctors. | ☐ | ☐ |

1. Would you mind coming for a day HPV vaccine literacy program 1. ☐ Yes 2. ☐ No
2. If yes, kindly include your whatsapp number ……………………………………………….
3. Would you like to take the vaccine if it is brought to your community? 1.☐ Yes 2. ☐ No

Thank you very much for your participation
